# Supplementary material
Source: publisher figshare collection journal article supplement (https://sage.figshare.com/ndownloader/files/23612652)
Supplement: Supplementary file 1 [file 23612652]

## Sheet: primary_data
residency in city	age	1	2	3	4	5	6	7	8	9	10	11	12	13	14	15	16	17	18	19	20	21	22	23	24	25	26	27	28	29	30a	30b
0	13	1	0	0	1	1	1	1	1	1	0	0	1	1	1	1	0	1	0	0	1	1	1	0	1	0	1	1	1	1	1	1
0	13	0	1	1	1	1	1	1	1	1	c	1	1	1	1	c	0	1	1	1	1	1	1	0	1	1	1	1	1	1	1	1
0	13	1	1	1	1	1	1	1	1	1	0	1	1	1	1	1	1	1	1	1	1	1	1	0	1	1	1	1	1	1	1	1
0	13	1	1	0	1	1	1	1	1	1	1	0	1	1	1	1	1	1	0	1	1	1	1	0	1	1	1	1	1	1	1	1
0	13	1	0	0	1	1	1	1	1	1	0	1	1	1	1	1	1	1	0	0	1	1	1	0	1	1	1	1	1	1	1	1
0	13	c	0	0	1	1	1	1	1	1	0	1	1	1	1	0	1	1	0	1	1	1	1	1	1	1	1	1	1	1	1	1
0	13	1	1	1	1	1	1	1	1	1	1	1	1	1	1	1	1	1	1	1	1	1	1	1	1	1	1	1	1	1	1	1
0	13	1	1	1	1	1	1	1	1	1	1	1	1	1	1	1	1	1	1	1	1	1	1	1	1	1	1	1	1	1	1	1
0	13	1	1	1	1	1	1	1	1	1	1	1	1	1	1	1	1	1	1	1	1	1	1	1	1	1	1	1	1	1	1	1
0	13	1	0	1	1	1	1	1	1	1	1	1	1	1	1	1	0	1	1	1	1	1	1	1	1	1	1	1	1	1	1	1
0	13	1	c	1	1	1	1	0	1	1	c	1	1	1	1	1	1	1	1	1	1	1	1	1	1	1	1	1	1	1	1	1
0	13	1	1	1	0	1	1	0	1	1	1	1	1	1	1	1	1	1	1	1	1	1	1	1	1	1	1	1	1	1	1	1
1	13	c	0	0	1	1	1	1	1	1	0	0	0	1	1	0	1	1	0	0	1	1	c	0	1	0	1	1	1	1	0	1
1	13	c	0	c	1	1	1	1	1	1	1	1	1	1	1	c	0	1	0	0	1	1	1	1	1	1	1	1	1	1	0	1
1	13	1	1	1	1	1	1	1	1	1	0	0	0	1	1	0	0	c	0	0	1	1	1	0	1	1	1	1	1	1	0	1
1	13	1	c	c	1	1	1	1	1	1	1	1	1	1	1	0	0	1	1	0	1	1	1	0	1	c	1	1	1	1	1	1
1	13	1	0	c	1	1	1	0	1	1	0	c	c	1	1	c	0	c	1	c	1	1	1	0	1	1	1	1	1	1	1	1
1	13	c	1	0	1	1	1	1	1	1	c	0	1	1	1	1	c	1	c	0	1	1	1	1	1	1	1	1	1	1	1	1
1	13	1	0	c	0	1	1	0	1	1	0	0	1	1	1	0	0	1	0	0	1	1	1	0	1	1	1	1	1	1	1	1
1	13	1	0	0	0	1	1	0	1	1	1	0	1	1	1	1	1	1	0	0	1	1	1	0	1	1	1	1	1	1	1	1
1	13	1	c	c	1	1	1	1	1	1	0	1	1	1	1	1	1	1	1	0	1	1	1	0	1	1	1	1	1	1	1	1
1	13	c	0	0	1	1	1	1	1	1	0	0	1	1	1	1	0	1	1	0	1	1	1	0	1	1	1	1	1	1	1	1
1	13	c	0	1	1	1	1	1	1	1	0	1	1	1	1	1	0	1	1	0	1	1	1	0	1	1	1	1	1	1	1	1
1	13	c	c	c	1	1	1	1	1	1	1	1	1	1	1	1	1	0	1	1	1	1	1	0	1	1	1	1	1	1	1	1
1	13	1	0	0	1	1	1	1	1	1	0	1	1	1	1	0	c	1	1	1	1	1	1	0	1	1	1	1	1	1	1	1
1	13	0	0	0	1	1	1	1	1	1	0	1	1	1	1	1	1	1	1	0	1	1	1	1	0	1	1	1	1	1	1	1
1	13	c	0	c	1	1	1	1	1	1	1	1	1	1	1	0	0	1	0	1	1	1	1	1	0	1	1	1	1	1	1	1
1	13	1	c	1	1	1	1	c	1	1	0	c	1	1	1	c	0	1	0	1	1	1	1	0	1	1	1	1	1	1	1	1
1	13	1	0	1	0	1	1	1	1	0	c	1	1	1	1	1	1	1	0	1	1	1	1	1	1	1	1	1	1	1	1	1
1	13	1	0	c	1	1	1	1	1	1	0	0	1	1	1	1	1	1	1	1	1	1	1	1	1	1	1	1	1	1	1	1
1	13	1	c	c	1	1	1	1	1	1	1	c	1	1	1	1	1	1	1	1	1	1	1	1	1	1	1	1	1	1	1	1
1	13	c	c	c	1	1	1	0	1	1	1	1	1	1	1	0	1	1	1	1	1	1	1	1	1	1	1	1	1	1	1	1
1	13	1	0	1	1	1	1	1	1	1	1	1	1	1	1	1	0	1	1	1	1	1	1	1	1	1	1	1	1	1	1	1
1	13	c	0	0	1	1	1	1	1	1	0	1	1	1	1	1	0	1	1	0	1	1	1	1	1	1	1	1	1	1	1	1
1	13	c	1	0	1	1	1	1	1	1	1	0	1	1	1	0	0	1	1	0	1	1	1	1	1	1	1	1	1	1	1	1
1	13	c	c	c	1	1	1	0	0	1	0	1	1	1	1	0	c	1	0	0	1	0	1	1	1	1	1	1	1	1	1	1
1	13	c	c	c	1	1	1	1	1	1	c	1	1	1	1	1	1	c	1	1	c	1	1	c	1	1	1	1	1	1	1	1
1	12	0	0	1	1	1	1	0	1	1	c	0	1	1	1	0	0	c	0	0	1	c	c	0	c	1	1	1	1	c	1	1
1	12	0	0	0	1	1	1	1	1	0	0	0	0	1	1	1	1	1	c	0	1	1	1	0	1	0	1	1	1	1	1	1
1	12	1	0	c	1	1	1	1	1	1	c	0	1	1	1	1	0	1	1	c	1	1	1	1	1	1	1	1	1	1	1	1
1	12	1	0	0	1	1	1	1	1	1	0	0	c	1	1	1	0	0	c	1	1	1	1	0	1	1	1	1	1	1	1	1
1	12	1	0	1	1	1	1	c	1	1	0	1	1	1	1	1	c	c	0	1	1	1	1	0	1	1	1	1	1	1	1	1
1	12	c	c	c	0	1	1	1	1	1	0	1	1	1	1	1	1	1	1	1	1	1	1	0	1	1	1	1	1	1	1	1
1	12	1	1	1	1	1	1	1	1	1	1	1	1	1	1	1	1	1	1	1	1	1	1	0	1	1	1	1	1	1	1	1
1	12	1	1	1	1	1	1	1	1	1	1	1	1	1	1	1	1	1	1	1	1	1	1	0	1	1	1	1	1	1	1	1
1	12	1	1	1	1	1	1	0	1	1	0	1	1	1	1	1	0	1	1	1	1	1	1	0	1	1	1	1	1	1	1	1
1	12	1	c	c	1	1	1	1	1	1	0	0	1	1	1	1	0	1	1	0	1	1	1	0	1	1	1	1	1	1	1	1
1	12	1	0	0	1	1	1	1	1	1	0	0	0	1	1	1	0	1	0	0	1	1	1	0	1	1	1	1	1	1	1	1
1	12	1	0	0	1	1	1	1	1	1	0	0	1	1	1	0	0	0	0	0	1	1	1	0	1	1	1	1	1	1	1	1
1	12	c	0	0	1	1	1	0	1	1	c	0	0	1	1	1	0	c	0	0	1	1	1	0	1	1	1	1	1	1	1	1
0	12	1	0	0	1	1	1	0	1	1	0	1	1	1	1	1	0	1	0	0	1	1	1	0	1	0	1	1	1	1	1	1
0	12	c	0	c	1	1	1	1	1	1	0	1	1	1	1	1	1	1	1	1	1	1	1	0	1	1	1	1	1	1	1	1
0	12	1	0	0	1	1	1	1	1	1	0	1	1	1	1	1	0	1	0	1	1	1	1	0	0	1	1	1	1	1	1	1
1	14	1	c	1	c	1	1	0	0	1	1	0	1	1	1	1	0	1	0	1	c	0	1	c	1	1	1	1	1	1	1	1
1	14	1	1	1	1	1	1	0	1	1	0	1	1	1	1	1	0	1	1	1	1	1	1	0	1	1	1	1	1	1	1	1
1	14	0	0	0	0	1	1	1	1	1	0	0	1	1	1	0	c	c	c	c	1	c	1	c	1	1	1	1	1	1	1	1
1	14	1	1	1	1	1	1	1	1	1	1	1	1	1	1	1	1	1	1	1	1	1	1	1	1	1	1	1	1	1	1	1
0	14	1	c	0	1	1	1	1	1	1	1	1	1	1	1	1	0	c	0	1	1	1	1	0	1	1	1	1	1	1	1	1
1	14	1	1	1	1	1	1	1	1	1	1	1	1	1	1	1	1	1	1	1	1	1	1	1	1	1	1	1	1	1	1	1
1	14	1	c	c	1	1	1	1	1	1	0	0	1	1	1	1	1	c	1	0	1	1	1	0	1	1	1	1	1	1	1	1
1	14	1	0	0	1	1	1	1	1	1	0	1	1	1	1	1	1	1	1	1	1	1	1	1	1	1	1	1	1	1	1	1
1	14	c	c	c	1	1	1	1	1	1	1	1	1	1	1	1	1	1	1	0	1	1	1	0	1	1	1	1	1	1	1	1
1	14	1	0	0	1	1	1	1	1	1	1	1	1	1	1	1	1	1	0	1	1	1	1	0	1	1	1	1	1	1	1	1
1	14	0	0	0	0	1	0	0	0	0	0	0	1	1	1	1	0	1	0	0	1	1	1	0	1	0	1	1	1	1	1	1
1	14	1	0	c	1	1	1	0	1	1	1	0	1	1	1	1	1	1	1	0	1	0	1	0	1	0	1	0	1	1	0	1
1	14	c	0	0	1	1	1	1	1	1	0	1	1	1	1	1	1	1	0	1	1	1	1	1	1	1	1	1	1	1	1	1
1	14	c	0	0	1	1	1	1	1	1	1	0	1	1	1	c	0	0	0	0	0	1	1	c	1	1	1	1	1	1	1	1
1	14	c	0	c	1	1	1	0	1	1	1	1	1	1	1	1	1	c	0	1	1	1	1	1	1	1	1	1	1	1	1	1
1	14	c	c	c	1	1	1	c	1	1	1	1	1	1	1	1	1	1	1	1	1	1	1	0	1	1	1	1	1	1	1	1
1	14	1	0	0	1	1	1	1	1	1	0	1	1	1	1	1	1	1	1	1	1	1	1	1	1	1	1	1	1	1	1	1
1	14	0	0	0	1	1	1	c	1	1	1	1	1	1	1	0	0	0	c	c	c	1	1	0	1	1	1	1	1	c	c	1
1	14	1	0	c	1	1	1	0	1	1	0	0	0	1	1	1	0	1	0	0	1	1	1	0	1	1	1	1	1	1	1	1
1	14	c	0	c	1	1	1	1	1	1	0	1	c	1	1	c	c	1	1	c	1	1	1	0	1	1	1	1	1	1	1	1
1	14	0	0	0	1	1	1	0	1	1	0	0	0	1	0	1	0	1	0	0	1	1	1	0	1	0	1	1	1	1	1	1
1	14	1	0	0	1	1	1	1	1	1	0	1	0	1	1	0	1	1	1	1	1	1	1	0	1	1	1	1	1	1	1	1
1	14	1	0	0	1	1	1	1	1	1	1	1	1	1	1	1	1	0	1	1	1	1	0	1	1	1	1	1	1	1	1	1
1	14	1	c	c	1	1	1	1	1	1	0	1	1	1	1	1	1	1	1	1	1	1	1	c	1	1	1	1	1	1	1	1
1	14	c	0	0	1	1	1	1	1	0	0	1	1	1	1	1	0	1	1	1	1	1	1	1	1	1	1	1	1	1	1	1
1	14	c	0	0	1	1	1	1	1	0	0	1	1	1	1	1	0	1	1	1	1	1	1	1	1	1	1	1	1	1	1	1
1	14	c	0	0	1	1	1	1	1	1	0	1	1	1	1	1	0	c	1	1	1	1	1	0	1	1	1	1	1	1	1	1
1	14	c	c	c	1	1	1	1	1	1	0	1	c	1	1	c	c	1	1	0	1	1	1	c	1	1	1	1	1	1	1	1
1	14	c	c	c	1	1	1	0	1	1	0	1	c	1	1	1	c	1	1	c	1	1	1	c	1	1	1	1	1	1	1	1
1	14	1	0	0	1	1	1	1	1	1	0	1	1	1	1	1	0	1	1	1	1	1	1	1	1	1	1	1	1	1	1	1
1	14	1	c	c	1	1	1	1	1	1	0	1	1	1	1	1	1	1	1	1	1	1	1	c	1	1	1	1	1	1	1	1
1	14	1	c	c	1	1	1	1	1	1	1	0	1	1	1	1	0	1	0	0	1	1	1	1	1	1	1	1	1	1	1	1
1	14	1	c	c	1	1	1	1	1	1	1	1	1	1	1	1	0	1	1	1	1	1	1	1	1	1	1	1	1	1	1	1
1	14	0	0	0	1	1	1	1	1	1	0	1	1	1	1	0	1	1	0	1	1	0	0	0	1	0	1	1	1	1	1	1
1	14	1	0	1	1	1	1	1	1	1	0	0	1	1	1	1	0	1	1	0	1	1	1	0	1	1	1	1	1	1	1	1
1	14	1	1	c	1	1	1	0	1	1	0	1	0	1	1	1	0	1	0	c	1	1	1	0	1	1	1	1	1	1	1	1
1	14	0	0	0	1	1	1	1	1	1	c	1	1	1	1	0	0	1	0	0	1	1	1	0	1	1	1	1	1	1	1	1
1	14	1	0	0	1	1	1	1	1	1	0	1	1	1	1	1	0	1	1	1	1	1	1	0	1	1	1	1	1	1	1	1
1	14	1	0	1	1	1	1	1	1	1	0	1	1	1	1	1	1	1	1	0	1	1	1	0	1	1	1	1	1	1	1	1
1	14	c	c	c	1	1	1	1	1	1	0	1	1	1	1	1	1	1	1	1	1	1	1	1	1	1	1	1	1	1	1	1
1	14	1	0	0	1	1	1	1	1	1	0	1	1	1	1	0	1	1	0	0	1	0	1	1	0	1	1	1	1	1	1	1
1	14	0	0	0	1	1	1	0	1	1	1	0	1	1	1	1	1	0	1	1	1	1	0	1	1	1	1	1	1	1	1	1
1	14	1	0	0	1	1	1	1	1	1	0	1	1	1	1	1	1	1	1	1	1	1	1	1	1	1	1	1	1	1	1	1
1	14	c	0	0	0	1	1	1	1	1	1	0	1	1	1	0	1	1	1	1	1	1	1	1	1	1	1	1	1	1	1	1
1	14	0	0	0	1	1	1	0	0	0	1	0	1	1	0	1	0	1	0	0	1	1	1	0	1	1	1	1	1	1	0	1
1	14	0	0	0	1	1	1	1	1	1	0	1	0	1	1	1	0	1	0	0	1	1	1	0	1	1	0	1	1	1	1	1
1	14	1	0	0	0	1	1	0	1	1	0	0	1	1	1	1	1	1	0	0	1	1	1	0	1	1	1	1	1	1	1	1
1	14	0	0	1	1	1	1	1	1	1	0	1	1	1	1	1	0	1	1	0	1	1	1	1	1	1	1	1	1	c	1	1
1	14	c	0	0	1	1	1	1	1	1	0	1	1	1	1	1	1	1	1	1	1	1	1	1	1	1	1	1	1	1	1	1
1	14	1	0	0	1	1	1	1	1	1	1	0	1	1	1	1	1	1	0	0	1	1	1	0	1	1	1	1	1	1	1	1
1	14	c	0	0	1	1	1	1	1	1	0	1	1	1	1	1	0	1	1	1	1	1	1	1	1	1	1	1	1	1	1	1
1	14	c	0	c	1	1	1	1	1	1	0	1	1	1	1	1	1	1	0	1	1	1	1	0	1	0	1	1	1	1	1	1
1	14	1	c	c	1	1	1	1	1	1	1	1	1	1	1	1	0	1	1	1	1	1	1	1	1	1	1	1	1	1	1	1
1	14	1	0	c	1	1	1	1	1	1	1	1	1	1	1	1	1	1	1	1	1	1	1	1	1	1	1	1	1	1	1	1
1	14	1	0	c	1	1	1	1	1	1	0	1	1	1	1	1	1	1	1	1	1	1	1	0	1	1	1	1	1	1	1	1
1	14	1	0	0	1	1	1	1	1	1	1	1	0	0	0	0	0	0	1	1	1	1	1	1	1	1	1	1	1	1	1	1
0	12	1	0	c	0	1	1	0	1	1	0	1	1	1	1	0	0	1	0	0	1	1	c	0	c	1	1	1	1	1	1	1
0	12	c	c	c	1	1	1	1	1	1	1	0	0	1	1	1	1	1	1	0	1	1	1	1	1	0	1	1	1	1	1	1
0	12	c	c	c	1	1	1	1	1	1	1	1	1	1	1	1	1	1	1	1	1	1	1	1	1	1	1	1	1	1	1	1
0	12	c	c	c	1	1	1	1	1	1	1	1	1	1	1	1	1	1	1	1	1	1	1	1	1	1	1	1	1	1	1	1
0	12	1	1	1	1	1	1	1	1	1	1	1	1	1	1	1	1	1	1	1	1	1	1	1	1	1	1	1	1	1	1	1
0	12	0	0	0	1	1	1	1	1	1	0	1	1	1	1	1	1	1	1	0	1	1	1	0	1	1	1	1	1	1	1	1
0	12	c	c	c	1	1	1	1	1	1	1	0	0	1	1	1	1	1	1	0	1	1	1	1	1	c	1	1	1	1	1	1
0	12	0	0	1	1	1	1	1	1	1	0	1	0	1	1	1	1	1	1	0	1	1	1	0	1	1	1	1	1	1	1	1
1	12	c	c	c	1	1	1	1	1	1	0	1	1	1	1	1	1	1	1	c	1	1	1	1	1	1	1	1	1	1	1	1
1	12	0	c	0	1	1	1	c	1	1	0	1	1	1	1	1	c	c	c	1	1	1	1	0	1	1	1	1	1	1	1	1
1	12	1	0	c	1	1	1	0	0	1	1	1	1	1	1	1	1	1	0	1	1	1	1	0	1	1	1	1	1	1	1	1
1	12	1	c	c	1	1	1	0	1	1	1	1	1	1	1	1	0	1	0	0	1	1	1	0	1	1	1	1	1	1	1	1
1	12	c	0	0	1	1	1	1	1	1	0	0	0	1	1	c	0	c	0	0	1	1	c	0	1	1	1	0	1	1	1	1
1	12	0	0	1	1	1	1	1	1	1	0	c	1	1	1	c	1	1	0	1	1	1	1	0	1	1	1	1	1	1	1	1
1	12	0	1	1	0	1	1	0	0	0	1	c	1	1	1	1	0	1	0	0	1	1	1	0	1	1	1	1	1	1	1	1
1	12	1	c	0	1	1	1	1	1	1	1	1	1	1	1	1	0	1	1	1	1	1	1	1	1	0	1	1	1	1	1	1
1	12	1	1	1	1	1	1	1	1	1	0	1	1	1	1	1	1	1	0	1	1	0	1	1	1	1	1	1	1	1	1	1
1	12	c	0	0	0	1	1	0	1	0	0	0	1	1	1	0	0	1	0	0	1	1	0	1	1	1	1	1	1	1	1	1
1	12	c	0	0	1	1	1	1	1	1	0	0	1	1	1	c	0	c	c	0	1	1	0	1	1	1	1	1	1	1	1	0
1	12	1	1	1	0	1	0	0	0	1	1	1	0	0	1	1	1	1	1	1	1	1	1	1	0	0	0	0	0	1	1	1
1	12	c	c	0	1	1	1	1	1	1	0	0	1	1	1	1	0	1	1	0	1	1	1	0	1	1	1	1	1	1	1	1
1	12	1	0	1	1	1	1	0	1	1	1	0	1	1	1	1	1	1	1	0	1	1	1	0	1	1	1	1	1	1	1	1
1	12	1	0	0	1	1	1	1	1	1	1	1	1	1	1	1	1	1	1	1	1	1	1	1	1	1	1	1	1	1	1	1
1	12	1	1	1	1	1	1	1	1	1	0	0	1	1	1	1	1	1	1	0	1	1	1	0	1	1	1	1	1	1	1	1
1	12	1	c	c	1	1	1	1	1	1	0	c	c	1	1	1	0	1	0	0	1	1	1	0	1	0	1	1	1	1	1	1
1	12	1	0	0	0	1	1	1	1	1	0	1	1	1	1	0	0	0	0	0	1	0	1	0	0	0	1	0	1	1	1	0
1	12	c	c	c	1	1	1	1	1	1	c	c	1	1	1	1	1	1	0	c	1	c	1	c	1	c	1	1	1	1	1	1
1	12	1	1	1	1	1	1	0	1	1	0	1	0	1	1	1	0	1	1	1	1	1	1	0	1	1	1	1	1	1	1	1
1	12	1	1	1	1	1	1	0	1	1	0	1	0	1	1	1	0	1	1	1	1	1	1	0	1	1	1	1	1	1	1	1
1	12	1	0	0	1	1	1	1	1	1	0	0	0	1	1	1	1	0	0	0	0	1	1	0	1	0	1	1	1	1	1	1
1	12	1	c	c	1	1	1	0	1	1	c	0	1	1	1	1	0	1	1	1	1	1	1	1	1	1	1	1	1	1	1	1
1	12	1	1	0	1	1	1	1	1	1	1	0	1	1	1	1	0	1	1	0	1	1	1	0	1	1	1	1	1	1	1	1
1	12	1	0	1	1	1	1	0	0	0	1	0	1	1	1	1	0	1	0	0	1	1	1	0	1	1	1	1	1	1	1	1
1	12	1	1	1	1	1	1	1	1	1	0	0	0	1	1	1	0	1	0	0	1	0	1	0	1	1	1	1	1	1	1	1
1	12	1	0	0	1	1	1	1	1	1	1	1	1	1	1	1	1	1	1	1	1	1	1	1	1	1	1	1	1	1	1	1
0	13	0	0	1	1	1	1	1	1	0	1	0	1	1	1	1	1	1	0	0	1	1	1	1	1	1	1	1	1	1	1	1
0	13	1	0	1	1	1	1	c	c	c	0	1	1	1	1	1	1	1	0	1	1	1	1	1	1	0	1	1	1	1	1	1
0	13	1	1	1	1	1	1	1	1	1	0	1	1	1	1	1	1	1	0	1	1	0	1	1	1	1	1	1	1	1	1	1
1	13	c	0	0	0	1	1	0	1	1	c	c	1	1	1	0	1	c	0	1	1	1	1	1	1	1	1	1	1	1	1	1
1	13	1	0	0	1	1	1	0	1	1	0	0	1	1	1	0	0	0	0	1	1	1	1	1	1	1	1	1	1	1	1	1
1	13	1	c	c	1	1	1	1	1	1	0	1	1	1	1	1	1	1	1	1	1	1	1	0	1	1	1	1	1	1	1	1
1	13	1	0	1	1	1	1	1	1	1	1	0	0	1	1	1	0	1	0	0	1	1	1	0	1	1	1	1	1	1	1	1
0	14	0	0	0	1	1	1	0	1	1	1	0	0	1	1	1	1	1	0	0	1	1	1	0	1	1	1	1	1	1	1	1
0	14	1	1	1	1	1	1	1	1	1	1	1	1	1	1	1	1	1	1	1	1	1	1	1	1	1	1	1	1	1	1	1
0	14	1	0	0	1	1	1	1	1	1	1	1	1	1	1	1	1	1	1	0	1	1	1	1	1	1	1	1	1	1	1	1
0	14	1	c	c	1	1	1	1	1	1	1	1	1	1	1	1	1	1	1	1	1	1	1	1	1	1	1	1	1	1	1	1
0	14	1	1	1	1	1	1	1	1	1	1	1	1	1	1	1	1	1	1	1	1	1	1	1	1	1	1	1	1	1	1	1
0	14	c	c	c	0	1	1	1	1	1	1	1	1	1	1	1	0	1	1	1	1	1	1	1	1	1	1	1	1	1	1	1
0	14	1	1	1	1	1	1	1	1	1	1	1	1	1	1	1	1	1	1	1	1	1	1	1	1	1	1	1	1	1	1	1
0	14	c	c	c	1	1	1	1	1	1	1	1	1	1	1	1	1	1	1	1	1	1	1	1	1	1	1	1	1	1	1	1
0	14	1	1	1	1	1	1	0	0	0	1	1	1	1	1	1	1	1	1	1	1	1	1	1	1	1	1	1	1	1	1	1
0	14	c	0	0	1	0	1	0	1	1	0	0	0	1	1	1	1	1	0	0	1	1	0	0	1	1	1	1	1	1	1	1
0	14	0	0	0	1	1	1	0	1	1	1	1	0	1	1	1	1	1	0	0	1	1	1	1	1	1	1	1	1	1	1	1
0	12	1	0	0	1	1	1	1	1	1	c	1	1	1	1	1	0	1	1	1	1	1	1	0	1	1	1	1	1	1	1	1
0	12	c	0	0	1	1	1	1	1	1	0	0	c	1	1	1	1	0	0	0	1	1	1	0	1	1	1	1	1	0	1	1	Nevěděla, co je chrpa
1	12	1	0	0	1	1	1	1	1	1	0	0	1	1	0	1	1	1	0	1	1	1	1	0	1	1	1	1	1	0	0	0
1	12	1	0	c	1	1	1	1	1	0	0	c	c	c	1	1	c	0	0	c	0	1	1	1	1	1	0	c	0	1	0	c
1	12	c	0	1	1	0	1	0	1	1	0	0	1	1	1	1	c	c	0	0	1	1	1	1	0	1	1	1	1	1	0	1
1	12	1	0	1	1	1	1	1	1	1	0	1	1	1	1	1	0	1	0	1	1	1	1	0	1	1	1	1	1	1	1	0
1	12	c	0	c	1	1	1	1	1	1	0	0	1	1	1	1	0	1	1	0	1	1	1	0	1	1	1	1	1	1	0	1
1	12	1	0	0	1	1	1	1	1	1	1	c	1	1	1	0	c	1	0	1	1	1	1	0	1	1	1	1	1	1	0	1
1	12	0	c	0	1	1	1	1	1	1	0	0	c	1	1	c	0	1	1	0	1	1	1	0	1	1	1	1	1	0	1	1
1	12	c	0	0	1	1	1	1	1	1	1	0	1	1	1	1	1	1	1	1	1	1	1	1	c	1	1	1	1	1	1	1
1	12	c	0	c	1	1	1	1	1	1	0	0	0	1	1	c	0	c	0	0	1	1	c	0	c	1	1	1	1	1	1	1
1	12	1	0	c	1	1	1	1	1	1	0	0	c	1	1	0	c	1	0	c	1	0	1	c	c	1	1	1	1	1	1	1
1	12	1	0	0	1	1	0	0	0	c	0	1	0	1	1	0	0	1	0	1	c	0	1	0	0	1	1	1	1	1	1	1
1	12	c	c	c	c	1	1	1	1	1	1	1	1	1	1	1	1	1	0	1	1	1	1	1	1	1	1	1	1	1	1	1
1	12	1	0	c	c	1	1	1	1	1	c	1	c	1	1	1	c	1	0	1	1	1	1	1	1	1	1	1	1	1	1	1
1	12	1	c	c	1	1	1	1	1	1	c	1	1	1	1	1	c	1	1	1	1	1	1	1	1	1	1	1	1	1	1	1
1	12	1	0	c	1	1	1	1	1	1	0	c	0	1	1	0	0	1	0	0	1	1	1	1	1	1	1	1	1	1	1	1
1	12	1	c	0	1	1	1	1	1	1	0	c	0	1	1	1	0	c	1	1	c	1	1	0	1	1	1	1	1	1	1	1
1	12	c	c	c	1	1	1	1	1	1	0	1	1	1	1	1	0	1	c	1	1	1	1	0	1	1	1	1	1	1	1	1
1	12	1	0	1	1	1	1	1	1	1	1	0	1	1	1	1	1	1	1	c	1	1	1	0	1	1	1	1	1	1	1	1
1	12	c	0	c	1	1	1	1	1	1	c	1	1	1	1	c	0	0	0	1	1	1	1	0	1	1	1	1	1	1	1	1
1	12	1	0	c	1	1	1	0	1	1	c	1	c	1	1	1	1	1	0	1	1	1	1	0	1	1	1	1	1	1	1	1
1	12	1	c	c	1	1	1	1	1	1	1	1	1	1	1	1	0	1	0	1	1	1	1	0	1	1	1	1	1	1	1	1
1	12	1	0	1	1	1	1	1	1	1	0	1	1	1	1	1	0	1	0	1	1	1	1	0	1	1	1	1	1	1	1	1
1	12	1	0	0	1	1	1	1	1	1	0	0	1	1	1	1	0	1	0	1	1	1	1	0	1	1	1	1	1	1	1	1
1	12	0	0	0	1	1	1	1	1	1	0	0	1	0	1	1	0	1	0	1	1	1	1	0	1	1	1	1	1	1	1	1
1	12	c	c	1	1	1	1	1	1	1	1	1	1	1	1	0	0	1	1	1	1	1	1	0	1	1	1	1	1	1	1	1
1	12	c	c	c	1	1	1	1	1	1	1	1	1	1	1	1	1	1	1	1	1	1	1	1	1	1	1	1	1	1	1	1
1	12	1	0	0	1	1	1	1	1	1	0	c	0	1	1	1	0	c	1	1	1	1	1	0	1	1	1	1	1	1	1	1
1	12	c	0	0	0	1	1	0	1	1	0	0	0	1	1	1	0	1	1	0	1	1	1	0	1	1	1	1	1	1	1	1
1	12	c	0	1	1	1	1	1	1	1	c	1	1	1	1	0	0	1	1	0	1	1	1	1	1	1	1	1	1	1	1	1
1	12	1	c	c	1	1	1	1	1	1	c	0	c	1	1	1	c	1	1	0	1	1	1	0	1	1	1	1	1	1	1	1
1	12	1	1	c	1	1	1	1	1	1	1	0	1	c	1	1	c	1	1	0	1	1	1	0	1	1	1	1	1	1	1	1
1	12	0	0	0	1	1	1	0	1	1	0	0	0	1	1	c	0	c	0	0	1	1	1	0	1	1	1	1	1	1	1	1
1	12	c	c	c	1	1	1	1	1	1	0	1	1	1	1	1	0	1	0	c	1	1	1	0	1	1	1	1	1	1	1	1
1	12	1	1	1	1	1	1	1	1	1	0	1	1	1	1	1	1	1	1	0	1	1	1	0	1	1	1	1	1	1	1	1
1	12	c	c	c	1	1	1	1	1	1	0	1	c	1	1	1	c	c	0	c	1	1	1	0	1	1	1	1	1	1	1	1
1	12	1	0	1	1	1	1	0	1	1	1	0	0	1	1	1	1	1	0	0	1	0	1	0	0	0	1	1	1	1	1	1
1	12	1	c	c	1	1	1	0	1	1	c	0	0	1	1	1	1	c	0	0	1	0	c	0	1	0	1	1	1	1	1	1
1	12	c	0	0	c	1	1	0	1	1	c	0	1	1	0	0	c	0	0	1	0	0	0	0	1	0	1	1	1	1	1	1
1	12	c	c	0	1	1	1	1	1	1	c	0	0	1	1	0	0	0	1	1	1	1	1	0	1	0	1	1	1	1	1	1
1	12	1	0	0	1	1	1	1	1	0	c	0	c	0	1	0	0	1	0	0	1	1	1	1	1	c	1	1	1	1	1	1
1	12	0	c	0	1	1	1	1	1	1	0	0	0	1	1	c	c	c	0	0	1	1	1	0	1	c	1	1	1	1	1	1
0	13	1	1	1	1	1	1	1	1	c	c	1	1	1	1	1	1	1	c	c	1	1	1	c	1	c	1	1	1	1	1	1
0	13	c	0	0	1	1	1	1	1	1	0	1	0	1	1	1	0	1	0	0	1	0	1	0	1	1	1	1	1	1	1	1	pluh
1	13	0	0	c	0	1	1	1	1	1	0	0	0	1	1	0	0	0	0	0	1	0	1	1	0	0	1	1	0	1	1	1
1	13	c	0	0	1	1	1	1	1	1	0	0	0	1	1	0	0	c	0	0	1	1	1	0	0	1	1	1	0	1	1	1
1	13	c	c	c	1	1	1	1	1	1	0	0	1	1	1	1	0	c	0	c	1	1	1	0	0	1	1	1	c	1	1	1
1	13	c	0	c	1	1	0	1	1	1	0	1	0	1	1	1	0	0	0	0	1	0	1	0	0	0	1	0	0	1	1	1
1	13	1	c	0	c	1	1	0	1	1	0	1	1	1	1	0	0	c	0	0	1	1	1	0	1	1	0	1	1	1	1	1
1	13	c	0	c	1	1	1	c	1	1	c	1	1	1	1	c	c	1	0	c	1	0	1	c	1	0	1	1	1	1	1	1
0	13	1	c	c	1	1	1	1	1	1	0	0	1	1	1	c	0	1	0	1	1	1	1	0	1	0	1	1	1	1	1	1
1	13	0	c	c	1	1	1	1	1	1	0	0	0	1	1	1	0	0	0	0	1	1	1	0	1	0	1	1	1	1	1	1	zpev ptaku
1	13	1	0	0	1	1	1	1	1	0	0	1	0	0	1	1	0	1	0	0	1	1	1	0	1	0	1	1	1	1	1	1	ptáci vetsinu nezna
1	13	c	1	1	1	1	1	0	1	1	0	1	1	1	1	0	0	0	0	0	1	0	1	0	1	0	1	1	1	1	1	1
1	13	c	0	0	1	1	1	1	1	1	c	0	1	1	1	1	1	c	0	c	1	1	1	c	1	c	1	1	1	1	1	1
1	13	c	c	c	1	1	1	1	1	1	c	0	1	1	1	1	0	c	0	0	1	1	1	0	c	c	1	1	1	1	1	1
1	13	c	0	0	1	1	1	1	1	1	c	1	1	1	1	0	1	1	1	1	1	1	1	c	c	1	1	1	1	1	1	1
1	13	0	0	c	0	1	1	0	1	1	0	0	0	1	1	1	0	1	0	0	1	1	1	0	c	1	1	1	1	1	1	1
1	13	c	0	1	1	1	1	1	1	1	1	0	1	1	1	1	1	1	0	1	1	1	1	1	1	1	1	1	1	1	1	1
1	13	1	1	0	1	1	1	1	1	1	0	1	1	1	1	1	1	1	0	1	1	1	1	1	1	1	1	1	1	1	1	1
1	13	1	c	1	1	1	1	1	1	1	0	1	1	1	1	1	0	1	0	1	1	1	1	0	1	1	1	1	1	1	1	1
1	13	1	1	1	1	1	1	1	1	1	0	1	1	1	1	1	1	0	0	1	1	1	1	1	1	1	1	1	1	1	1	1
1	13	1	1	1	1	1	1	1	1	1	1	1	1	1	1	1	1	1	1	1	1	1	1	1	1	1	1	1	1	1	1	1
1	13	1	1	1	1	1	1	1	1	1	1	1	1	1	1	1	1	1	1	1	1	1	1	1	1	1	1	1	1	1	1	1
1	13	1	0	0	1	1	1	0	1	1	0	0	c	1	1	0	0	c	0	0	1	1	1	1	1	1	1	1	1	1	1	1
1	13	c	0	1	1	1	1	c	1	1	0	0	0	1	1	0	0	0	1	c	1	1	1	1	1	1	1	1	1	1	1	1
1	13	1	0	0	1	1	1	1	1	1	0	0	c	1	1	0	0	1	0	0	1	0	1	1	1	1	1	1	1	1	1	1
1	13	1	0	c	1	1	1	0	1	0	0	1	0	1	1	0	1	1	1	0	1	0	1	1	1	1	1	1	1	1	1	1
1	13	c	c	c	1	1	1	1	1	1	c	1	c	1	1	1	0	c	0	c	c	0	1	0	1	1	1	1	1	1	1	1
1	13	0	0	0	0	1	1	0	1	1	c	0	0	1	0	0	0	0	0	1	0	0	1	0	1	0	1	1	1	1	1	1
1	13	c	0	0	1	1	1	1	1	0	0	1	1	1	1	0	0	0	0	1	1	0	1	0	1	1	1	1	1	1	1	1
1	13	0	0	1	1	1	1	0	1	1	0	1	0	1	1	0	0	c	0	1	1	0	1	0	1	1	1	1	1	1	1	1
1	13	1	0	0	1	1	1	1	1	1	0	1	1	1	1	1	0	0	1	1	1	0	1	0	1	1	1	1	1	1	1	1
1	13	c	0	1	1	1	1	0	1	1	1	0	1	1	0	1	0	1	0	1	1	0	1	0	1	1	1	1	1	1	1	1
1	13	c	0	0	1	1	1	0	0	1	0	0	0	1	1	0	0	1	0	0	1	0	1	0	1	1	1	1	1	1	1	1
1	13	0	0	0	1	1	1	1	1	1	0	0	0	1	1	0	1	1	0	0	1	0	1	0	1	1	1	1	1	1	1	1
1	13	c	c	c	1	1	1	1	1	1	1	1	1	1	1	0	0	1	1	c	1	1	1	0	1	1	1	1	1	1	1	1
1	13	1	c	c	1	1	1	1	1	0	0	1	1	1	1	1	0	1	0	0	1	1	1	0	1	1	1	1	1	1	1	1
1	13	1	1	c	1	1	1	1	1	1	0	1	1	1	1	0	0	1	0	0	1	1	1	0	1	1	1	1	1	1	1	1
1	13	c	0	0	1	1	1	0	1	1	0	0	1	1	1	1	0	1	1	0	1	1	1	0	1	1	1	1	1	1	1	1
1	13	1	1	1	1	1	1	1	1	0	0	1	1	1	1	1	0	1	1	0	1	1	1	0	1	1	1	1	1	1	1	1
1	13	c	0	c	1	1	1	1	1	1	0	1	1	1	1	1	0	1	1	0	1	1	1	0	1	1	1	1	1	1	1	1
1	13	0	0	0	1	1	1	1	1	1	1	0	0	1	1	1	0	1	1	0	1	1	1	0	1	1	1	1	1	1	1	1
1	13	1	0	0	1	1	0	1	1	1	0	0	0	1	1	1	1	1	1	0	1	1	1	0	1	1	1	1	1	1	1	1
1	13	0	c	c	c	1	c	1	1	1	1	1	1	1	1	1	1	1	1	0	1	1	1	0	1	1	1	1	1	1	1	1
1	13	1	1	1	1	1	1	1	1	1	0	1	1	1	1	1	0	1	1	1	1	1	1	0	1	1	1	1	1	1	1	1
1	13	0	1	1	1	1	1	1	1	0	1	1	1	1	1	1	0	1	0	1	1	1	1	0	1	1	1	1	1	1	1	1
1	13	1	1	1	1	1	1	1	1	1	c	1	1	1	1	1	1	1	0	1	1	1	1	0	1	1	1	1	1	1	1	1
1	13	c	c	c	1	1	1	1	1	1	1	0	1	1	1	1	1	1	0	1	1	1	1	0	1	1	1	1	1	1	1	1
1	13	c	0	0	1	1	1	1	1	1	0	0	0	1	1	1	c	0	1	0	1	1	c	0	1	1	1	1	1	1	1	1
1	13	c	0	c	1	1	1	1	1	1	1	1	0	1	1	1	1	c	0	0	1	1	1	c	1	1	1	1	1	1	1	1
1	13	1	c	c	1	1	1	1	1	1	c	c	1	1	1	1	1	1	1	1	1	c	1	c	1	1	1	1	1	1	1	1
0	14	0	0	0	1	1	c	0	0	0	1	1	0	1	1	0	1	0	1	0	1	0	0	0	0	1	0	1	1	0	1	1
0	14	1	c	c	1	1	1	1	1	1	0	1	1	1	1	1	1	1	1	1	1	1	1	1	1	1	1	1	1	1	1	1
1	14	0	0	c	1	1	1	1	1	1	0	0	1	1	1	1	1	1	0	1	0	1	0	1	1	1	1	1	1	1	1	1
1	14	1	0	0	1	1	1	1	1	1	1	1	1	1	1	1	1	1	1	1	1	0	1	1	1	1	1	1	1	1	1	1
1	14	0	0	0	1	1	1	1	1	1	0	0	1	1	1	0	0	1	0	0	1	1	0	1	1	1	1	1	1	1	1	1
1	14	0	0	0	1	1	1	1	1	1	1	1	1	1	1	0	0	0	0	1	1	1	1	1	1	1	1	1	1	1	1	1
1	14	1	0	c	1	1	1	0	1	1	0	0	1	1	1	1	1	1	0	1	1	1	1	1	1	1	1	1	1	1	1	1
1	14	1	0	0	1	1	1	1	1	1	0	1	0	1	1	1	1	1	0	1	1	1	1	1	1	1	1	1	1	1	1	1
1	14	1	0	0	1	1	1	1	1	1	0	1	1	1	1	1	1	1	0	1	1	1	1	1	1	1	1	1	1	1	1	1
1	14	c	c	c	1	1	1	1	1	1	0	1	1	1	1	1	0	1	1	1	1	1	1	1	1	1	1	1	1	1	1	1
1	14	c	c	0	1	1	1	1	1	1	1	1	1	1	1	1	1	1	1	1	1	1	1	1	1	1	1	1	1	1	1	1
1	14	c	c	c	1	1	1	1	1	1	0	0	1	1	1	1	1	1	1	1	1	1	1	1	1	1	1	1	1	1	1	1
1	14	0	0	0	1	1	1	1	1	1	1	1	1	1	1	0	1	1	1	1	1	1	1	1	1	1	1	1	1	1	1	1
1	14	1	0	0	1	1	1	1	1	1	1	1	1	1	1	0	0	1	1	0	1	1	1	1	1	1	1	1	1	1	1	1
1	14	c	0	1	1	1	1	0	1	1	0	0	1	1	1	1	0	1	0	0	1	1	1	1	1	1	1	1	1	1	1	1
1	14	0	0	0	1	1	1	1	1	1	0	0	1	1	1	1	0	0	0	0	1	0	1	1	1	1	1	1	1	1	1	1
1	14	c	c	c	1	1	1	1	1	1	0	0	1	1	1	0	0	1	0	0	1	0	1	1	1	1	1	1	1	1	1	1
1	14	1	0	0	1	1	1	1	1	1	1	1	1	1	1	1	1	1	c	1	1	1	1	0	1	1	1	1	1	1	1	1
1	14	0	0	0	1	1	1	0	1	1	0	1	1	1	1	1	0	1	0	1	1	1	1	0	1	1	1	1	1	1	1	1
1	14	c	c	c	1	1	1	1	1	1	c	0	1	1	1	c	0	c	1	0	1	1	1	0	1	1	1	1	1	1	1	1
1	14	1	0	1	1	1	1	1	1	1	0	1	1	1	1	0	0	0	1	0	1	1	1	0	1	1	1	1	1	1	1	1
1	14	c	c	c	1	1	1	1	1	1	0	0	1	1	1	1	1	1	1	0	1	1	1	0	1	1	1	1	1	1	1	1
1	14	1	1	1	1	1	1	0	1	1	1	1	1	1	1	1	1	1	1	0	1	1	1	0	1	1	1	1	1	1	1	1
1	14	1	0	0	1	1	1	1	1	1	1	1	1	1	1	1	1	1	1	0	1	1	1	0	1	1	1	1	1	1	1	1
1	14	c	0	0	0	1	1	0	1	1	0	0	1	1	1	0	0	c	0	0	1	1	1	0	1	1	1	1	1	1	1	1
1	14	c	c	0	1	1	1	1	1	1	0	1	0	1	1	0	0	c	0	0	1	1	1	0	1	1	1	1	1	1	1	1
1	14	c	c	c	c	1	1	1	1	1	0	0	1	1	1	0	0	c	0	c	1	1	1	0	1	1	1	1	1	1	1	1
1	14	1	c	c	1	1	1	1	1	1	0	0	1	1	1	1	0	c	0	0	1	0	1	0	1	1	1	1	1	1	1	1
1	14	1	0	0	1	1	1	1	1	1	0	0	0	1	1	1	0	1	0	0	1	0	1	0	1	1	1	1	1	1	1	1
1	14	1	0	0	1	1	1	1	1	1	0	1	1	1	1	1	0	1	0	0	1	0	1	0	1	1	1	1	1	1	1	1
1	14	0	0	1	0	1	0	0	0	0	0	0	1	1	1	0	0	1	0	0	1	0	1	0	1	1	1	1	1	1	1	1
1	14	0	1	1	1	1	1	0	1	1	0	1	1	1	0	0	1	0	1	1	1	0	1	0	1	1	1	1	1	1	1	1
1	14	0	0	0	1	1	1	1	1	1	1	0	1	1	1	1	1	1	0	1	1	0	1	0	1	1	1	1	1	1	1	1
1	14	1	0	0	1	1	1	0	0	1	0	0	1	0	1	1	1	c	0	0	0	0	1	0	c	1	1	1	1	1	1	1
1	14	1	0	0	1	1	1	1	1	1	0	0	1	1	0	0	1	0	0	0	1	0	1	0	0	1	1	1	1	1	0	1
1	14	1	0	1	1	1	1	1	1	1	0	1	1	1	1	1	1	1	1	1	1	1	1	1	0	1	1	1	1	1	1	1
1	14	0	0	0	1	1	1	1	1	1	c	0	1	1	1	c	c	c	0	c	c	1	1	0	1	0	1	1	1	1	1	1
1	14	1	0	c	0	1	1	c	1	1	0	0	c	1	0	1	c	1	0	c	0	1	0	c	1	0	1	1	1	1	1	1
1	14	0	1	1	1	1	1	0	1	1	c	0	1	1	1	0	0	1	0	0	1	1	1	1	1	0	1	1	1	1	1	1
1	14	c	1	c	1	1	1	0	1	1	0	0	0	1	1	0	1	1	0	0	1	1	1	1	1	0	1	1	1	1	1	1
1	14	1	0	c	1	1	1	1	1	1	0	1	1	1	1	0	0	0	0	0	1	0	1	0	0	0	1	1	1	1	1	1
1	14	c	0	c	1	1	1	1	1	1	0	0	1	1	1	1	1	c	0	0	1	1	1	0	1	c	1	1	1	1	1	1
1	14	1	c	1	1	1	1	1	1	1	1	0	c	1	1	1	c	1	0	0	1	1	1	0	0	c	1	1	1	1	1	1
1	14	1	0	0	1	1	1	1	1	0	0	0	1	1	1	0	0	1	0	0	1	1	1	0	1	0	1	1	1	1	1	1
1	14	1	0	0	1	1	1	0	0	1	1	0	1	1	1	1	1	0	0	0	1	1	1	0	1	0	1	1	1	1	1	1
1	14	1	0	1	1	1	1	0	0	0	1	0	0	1	1	0	0	1	0	0	1	1	1	0	1	0	1	1	1	1	1	1
1	14	c	0	0	1	1	1	1	1	1	0	0	0	1	1	1	0	1	1	0	1	1	1	0	1	1	1	0	1	1	1	1
0	14	0	c	0	1	0	c	0	1	0	c	0	1	0	c	0	1	0	c	0	1	0	c	0	1	0	c	0	1	0	c	0
0	14	c	0	0	1	1	1	1	1	1	0	1	1	1	1	1	0	1	1	1	1	1	1	0	1	1	1	1	1	1	1	1	23
0	14	1	1	1	1	1	1	1	1	1	1	1	0	1	1	1	1	1	1	1	1	1	1	0	1	1	1	1	1	1	1	1
0	14	1	0	c	1	1	1	1	1	1	0	c	c	1	1	1	0	1	c	0	1	1	1	0	1	1	1	1	1	1	0	1
0	14	c	0	1	1	1	1	1	1	1	0	1	c	1	1	1	c	1	c	0	1	1	1	0	1	1	1	1	1	1	1	1
0	14	c	c	c	1	1	1	1	1	1	1	1	1	1	1	1	1	1	1	1	1	1	1	1	1	1	1	1	1	1	1	1
0	14	1	1	1	1	1	1	1	1	1	0	1	1	1	1	1	1	1	1	1	1	1	1	1	1	1	1	1	1	1	1	1
0	14	0	0	c	1	1	1	1	1	1	0	1	1	1	1	1	1	1	1	1	1	1	1	1	1	1	1	1	1	1	1	1
0	14	c	0	c	1	1	1	1	1	1	1	1	c	1	1	1	1	1	1	0	1	1	1	1	1	1	1	1	1	1	1	1
0	14	1	c	c	1	1	1	1	1	1	1	1	1	1	1	1	1	1	1	1	1	1	1	0	1	1	1	1	1	1	1	1
0	14	1	0	0	1	1	1	c	1	1	c	c	1	1	1	c	0	1	c	c	1	1	1	c	1	1	1	1	1	1	1	1
0	14	c	c	c	1	1	c	1	1	1	1	0	1	1	1	1	c	1	1	0	1	1	c	c	1	1	1	1	1	1	1	1
0	13	0	0	0	1	1	1	0	1	1	0	1	1	1	1	1	1	1	0	0	1	1	1	0	1	0	1	1	1	0	1	1
0	13	c	c	c	1	1	1	1	1	1	0	0	0	1	1	1	1	c	0	1	1	1	0	0	1	1	1	1	1	1	1	1
0	13	0	0	0	1	1	1	1	1	1	0	0	1	1	1	0	1	1	1	0	1	0	1	0	1	1	1	1	1	1	1	1	21
0	13	0	0	0	1	1	1	1	1	1	1	1	1	1	1	1	1	1	1	1	1	1	1	0	1	1	1	1	1	1	1	1
0	13	1	0	1	1	1	1	1	1	1	1	1	1	1	1	1	0	1	1	1	1	1	1	0	1	1	1	1	1	1	1	1
0	13	c	c	c	1	1	1	1	1	1	c	0	1	1	1	1	c	c	0	1	1	1	1	c	1	1	1	1	1	1	1	1
0	13	c	0	0	1	1	1	1	1	1	1	1	1	1	1	1	0	1	0	1	1	1	1	1	1	1	1	1	1	1	1	1
0	13	c	c	c	1	1	1	1	1	1	1	1	1	1	1	1	1	1	1	1	1	1	1	0	1	1	1	1	1	1	1	1
0	13	1	1	1	1	1	1	1	1	1	1	1	1	1	1	1	c	1	1	1	1	1	1	1	1	1	1	1	1	1	1	1
0	13	1	1	1	1	1	1	1	1	1	1	1	1	1	1	1	1	1	1	1	1	1	1	1	1	1	1	1	1	1	1	1
0	13	1	1	1	1	1	1	1	1	1	1	1	1	1	1	1	1	1	1	1	1	1	1	1	1	1	1	1	1	1	1	1
1	13	1	c	1	1	1	1	1	1	1	1	0	1	1	1	1	1	1	1	c	1	1	1	0	1	1	1	1	1	1	1	1	19 a 11
1	13	1	c	1	1	1	1	c	1	1	1	1	1	1	1	1	1	1	1	1	1	1	1	0	1	1	1	1	1	1	1	1
1	13	1	1	1	1	1	1	1	1	1	1	1	1	1	1	1	1	1	1	1	1	1	1	0	1	1	1	1	1	1	1	1
1	13	c	c	c	1	1	1	1	1	1	1	1	c	1	1	1	1	1	1	1	1	1	1	0	1	1	1	1	1	1	1	1	12
1	13	c	c	0	1	1	1	0	1	1	0	1	1	1	1	1	1	1	0	1	1	1	1	0	1	1	1	1	1	1	1	1	1
1	13	1	c	1	1	1	1	1	1	1	1	1	1	1	1	1	0	1	1	c	1	1	1	1	1	1	1	1	1	1	1	1
1	13	1	0	0	1	1	1	1	1	1	0	1	0	1	1	0	0	1	1	c	1	1	1	1	1	1	1	1	1	1	1	1
1	13	0	1	0	1	1	1	1	1	1	1	0	1	1	1	0	c	0	0	c	1	1	1	1	1	1	1	1	1	1	1	1
1	13	c	c	1	1	1	1	1	1	1	0	1	1	1	1	c	c	1	1	0	1	1	1	1	1	1	1	1	1	1	0	1
1	13	0	0	0	1	1	1	1	1	0	1	1	1	1	1	c	c	1	1	1	1	1	1	1	1	1	1	1	1	1	1	1
1	13	1	0	0	1	1	1	1	1	1	0	1	1	1	1	1	0	1	1	1	1	1	1	1	1	1	1	1	1	1	1	1
1	13	c	c	1	1	1	1	1	1	1	0	1	1	1	1	1	c	c	1	0	1	1	1	1	1	1	1	1	1	1	1	1
1	13	0	0	0	1	1	1	1	1	1	1	1	1	1	1	1	1	1	1	1	1	1	1	1	1	1	1	1	1	1	1	1
1	13	c	0	c	1	1	1	0	1	1	c	1	1	1	1	1	1	c	1	0	1	1	1	0	1	0	1	1	1	1	1	1	20
1	13	1	1	1	1	1	1	1	1	1	0	c	0	1	1	1	0	1	1	0	1	1	1	0	1	0	1	1	1	1	1	1
1	13	c	0	c	1	1	1	1	1	1	1	1	1	1	1	0	c	1	1	1	1	1	1	1	1	1	1	1	c	1	1	1
0	12	1	c	c	1	1	1	1	1	1	1	1	1	1	1	1	1	1	1	1	1	1	1	1	1	1	1	1	1	1	1	1
0	12	c	0	0	1	1	1	1	1	1	0	1	1	1	1	1	1	1	0	1	1	1	1	0	1	1	1	1	1	1	1	1
0	12	0	0	0	1	1	1	0	1	1	1	1	1	1	1	1	0	1	1	1	1	1	1	0	1	1	1	1	1	1	1	1
0	12	1	c	c	1	1	1	1	1	1	c	1	1	1	1	1	1	1	1	1	1	1	1	1	1	1	1	1	1	1	1	1
0	12	c	c	c	1	1	1	1	1	1	c	0	1	1	1	1	1	1	c	0	1	1	1	c	1	1	1	1	1	1	1	1
0	12	c	c	1	1	1	1	1	1	1	0	1	1	1	1	1	1	c	1	1	1	1	1	1	1	1	1	1	1	1	1	1
1	12	c	c	c	1	1	1	1	1	1	0	1	1	1	1	1	1	1	1	1	0	1	1	1	1	1	1	1	1	1	1	1
1	12	1	0	c	1	1	1	1	1	1	1	0	1	1	1	1	0	1	1	1	1	1	1	1	1	1	1	1	1	1	1	1
1	12	c	c	c	1	1	1	1	1	1	1	1	1	1	1	1	1	1	1	1	1	1	1	1	1	1	1	1	1	1	1	1
1	12	c	c	c	1	1	1	1	1	1	0	1	1	1	1	1	0	0	1	1	1	1	1	1	1	1	1	1	1	1	1	1
1	12	c	0	0	1	1	1	1	1	1	0	1	1	1	1	1	0	1	1	c	1	1	1	0	1	1	1	1	1	1	1	1
1	12	0	0	1	1	1	1	1	1	1	c	c	c	1	1	1	1	1	0	c	1	1	1	0	1	1	1	1	1	1	1	1
1	12	c	c	1	1	1	1	1	1	1	1	1	c	1	1	1	1	1	0	0	1	1	1	0	1	1	1	1	1	1	1	1
1	12	1	0	0	1	1	1	1	1	1	0	1	0	1	1	1	1	1	0	0	1	1	1	0	1	1	1	1	1	1	1	1
1	12	c	0	0	1	1	1	0	1	1	1	1	1	1	1	1	1	1	0	0	1	1	1	0	1	1	1	1	1	1	1	1
1	12	0	0	0	0	1	1	1	1	1	0	0	1	1	1	1	1	1	0	0	1	1	1	0	1	1	1	1	1	1	1	1
1	12	c	0	c	1	1	1	1	1	1	c	1	1	1	1	1	0	0	1	1	1	1	1	0	1	1	1	1	1	1	1	1
1	12	1	c	1	1	1	1	1	1	1	1	1	1	1	1	1	1	1	1	1	1	1	1	0	1	1	1	1	1	1	1	1
1	12	c	0	0	1	1	1	1	1	1	0	1	1	1	1	1	1	1	1	1	1	1	1	0	1	1	1	1	1	1	1	1
1	12	0	0	0	1	1	1	0	1	0	0	1	1	1	1	1	0	1	0	1	1	1	1	0	1	1	1	1	1	1	1	1
1	12	c	0	0	1	1	1	1	1	1	1	1	1	1	1	1	1	1	1	1	1	1	c	0	1	1	1	1	1	1	1	1
1	14	c	c	1	0	1	1	1	1	0	0	1	1	1	1	0	0	0	0	c	1	0	1	0	0	1	1	1	1	c	1	1
1	14	c	0	0	1	1	1	1	0	0	0	0	0	1	1	0	0	1	0	0	1	0	1	0	1	c	1	1	1	c	c	c
1	14	c	c	c	1	0	0	0	c	1	1	1	0	0	0	c	c	c	0	0	0	1	1	1	0	0	0	c	c	c	0	0
1	14	c	c	c	1	1	1	1	1	1	c	0	c	1	1	1	0	c	0	c	1	0	1	0	1	c	1	1	1	1	1	1
1	14	c	0	0	1	1	1	0	1	0	0	0	c	1	1	0	0	0	1	0	1	1	1	c	1	c	1	1	1	1	1	1
1	14	0	0	0	c	1	1	0	0	1	0	0	c	1	1	1	0	0	0	0	0	1	1	0	c	1	1	1	1	1	1	1
1	14	1	0	0	1	1	1	1	1	1	0	0	1	1	1	1	0	1	1	1	c	0	1	0	1	1	1	1	1	1	1	1
1	14	0	0	c	1	1	1	c	1	1	c	0	c	1	1	0	0	c	1	c	c	0	1	0	1	1	1	1	1	1	1	1
1	14	c	0	0	1	1	1	1	0	0	0	1	1	1	1	0	0	0	0	1	1	0	1	0	1	1	1	1	1	1	1	1
1	14	0	0	0	1	1	1	1	1	1	0	1	1	1	1	1	0	1	0	c	1	0	1	0	1	1	1	1	1	1	1	1
1	14	c	c	1	1	1	1	1	1	1	c	1	1	1	1	c	0	c	0	0	1	1	1	0	1	1	1	1	1	1	1	1
1	14	c	c	1	1	1	1	1	1	1	0	1	c	1	1	c	0	1	1	0	1	1	1	0	1	1	1	1	1	1	1	1
1	14	c	0	0	1	1	1	1	1	1	0	1	0	1	1	1	1	c	1	0	1	1	1	0	1	1	1	1	1	1	1	1
1	14	c	0	0	1	1	1	0	1	1	0	1	1	1	1	1	0	1	0	1	1	1	1	0	1	1	1	1	1	1	1	1
1	14	c	0	1	1	1	1	1	1	1	1	1	1	1	1	1	0	c	0	1	1	1	1	0	1	1	1	1	1	1	1	1
1	14	c	c	c	1	1	1	1	1	1	1	1	1	1	1	1	1	c	0	1	1	1	1	0	1	1	1	1	1	1	1	1
1	14	1	c	c	1	1	1	1	1	1	c	1	1	1	1	1	1	1	1	1	1	1	1	c	1	1	1	1	1	1	1	1
1	14	c	c	c	1	1	1	1	1	1	0	1	c	1	1	1	1	1	1	0	1	1	1	c	1	1	1	1	1	1	1	1	16
1	14	c	0	0	1	1	1	1	1	1	c	1	1	1	1	1	1	0	1	0	1	0	1	1	1	1	1	1	1	1	1	1
1	14	c	c	c	1	1	1	1	1	1	c	1	1	1	1	c	1	1	1	1	1	1	1	1	1	1	1	1	1	1	1	1
1	14	c	c	c	1	1	1	1	1	1	1	1	1	1	1	c	0	1	1	1	1	1	1	1	1	1	1	1	1	1	1	1
1	14	1	0	0	1	1	1	1	1	1	1	1	1	1	1	1	0	1	1	1	1	1	1	1	1	1	1	1	1	1	1	1
1	14	1	1	1	1	1	1	1	1	1	0	0	1	1	1	1	1	1	1	0	1	1	1	1	1	1	1	1	1	1	1	1
1	14	c	1	1	1	1	1	0	1	1	0	1	1	1	1	1	1	1	1	1	1	0	1	1	1	1	1	1	1	1	1	1
1	14	1	1	c	1	1	1	1	1	1	1	1	1	1	1	1	1	1	1	1	1	1	1	1	1	1	1	1	1	1	1	1
1	13	1	1	0	1	1	1	1	1	1	0	0	0	1	1	1	1	1	0	0	1	1	1	0	1	1	1	1	1	1	1	1
1	13	c	c	0	1	1	1	0	1	1	c	1	0	1	1	c	1	1	0	1	1	0	1	1	1	c	1	1	1	1	1	1
1	14	c	0	1	1	1	1	0	1	0	c	1	1	1	1	1	1	1	0	1	1	1	1	1	1	1	1	1	1	1	1	1
1	13	c	0	1	1	1	1	1	1	1	0	c	c	1	1	0	1	1	0	1	1	1	1	0	1	1	1	1	1	1	1	1
1	13	c	0	0	1	1	1	1	1	1	1	1	1	1	1	0	1	1	1	0	1	1	1	0	1	0	1	1	1	1	1	1
1	13	0	c	1	1	1	1	0	1	1	1	1	1	1	1	1	0	1	0	0	1	1	1	1	0	1	1	1	1	1	1	1
1	13	1	1	1	1	1	1	1	1	1	1	1	1	1	1	1	1	1	1	1	1	1	1	1	1	1	1	1	1	1	1	1
1	12	1	1	1	1	1	1	1	1	1	1	1	1	1	1	1	1	1	0	1	1	1	1	1	1	1	1	1	1	1	1	1
1	13	c	c	c	1	1	1	1	1	1	c	1	1	1	1	1	1	1	0	c	1	1	1	0	1	1	1	1	1	1	1	1
1	13	1	1	0	1	1	1	1	1	1	0	1	1	1	1	1	1	1	0	0	1	1	1	0	1	1	1	1	1	1	1	1
1	13	c	c	0	1	1	1	1	1	1	0	1	0	1	1	1	1	c	1	0	1	1	1	0	1	1	1	1	1	1	1	1
1	13	c	1	0	1	1	1	1	1	1	1	c	0	1	1	1	c	c	0	0	1	1	1	0	1	1	1	1	1	1	1	1
1	13	1	0	c	1	1	1	1	1	1	0	0	1	1	1	1	1	1	0	0	1	1	1	0	1	1	1	1	1	1	1	1
1	13	c	c	c	1	1	1	1	1	1	1	1	1	1	1	1	1	1	0	0	1	1	1	0	1	1	1	1	1	1	1	1
1	12	1	c	1	1	1	1	1	1	1	1	c	1	1	1	1	1	1	0	0	1	1	1	0	1	1	1	1	1	1	1	1
1	13	c	0	0	1	1	1	1	1	1	0	1	1	1	1	1	1	1	0	1	1	1	1	0	1	1	1	1	1	1	1	1
1	13	1	1	c	1	1	1	1	1	1	1	0	1	1	1	1	1	1	0	1	0	1	1	1	1	1	1	1	1	1	1	1
1	13	1	c	c	1	1	1	1	1	1	c	0	1	1	1	1	1	1	c	1	1	1	1	0	1	1	1	1	1	1	1	1

## Sheet: info
columns C:AG are answers on 31 questions.
0=no experience
1=real experience
c=only mediated experience
